# Supplementary material for: Role of the Exosome Secretion Machinery in Ovarian Carcinoma: In Vitro and In Vivo Models
Source: Hindawi journal article supplement (doi:10.1155/2020/4291827), 2020-05-30
Supplement: f1 [file 4291827.f1.pdf]

Supplementary data:

Figure legend:

Figure 1:

a) *RAB27B* ( $p < 0.02$ ) and b) *TSAP6* ( $p < 0.03$ ) mRNA expression in the ES-2 cell line.

Figure 2:

Images of the actual western blots of figure 2A-2C

Table 1:

Isolated tumor nodules ranges in mm in the various organs

Fig.1:

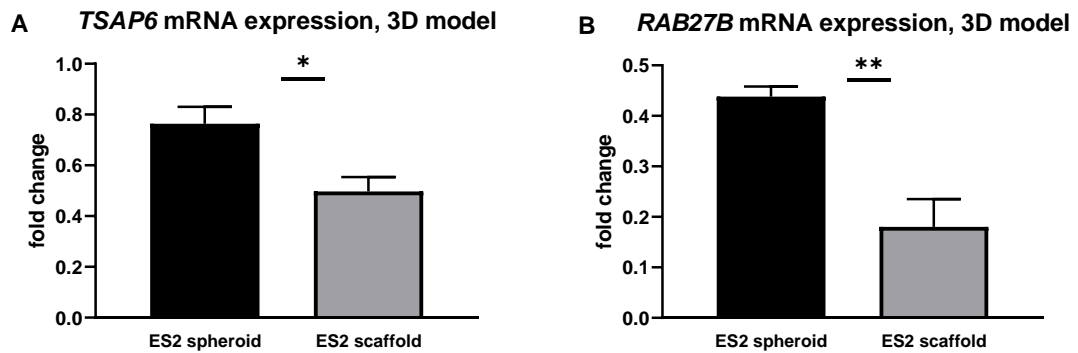

Fig.2:

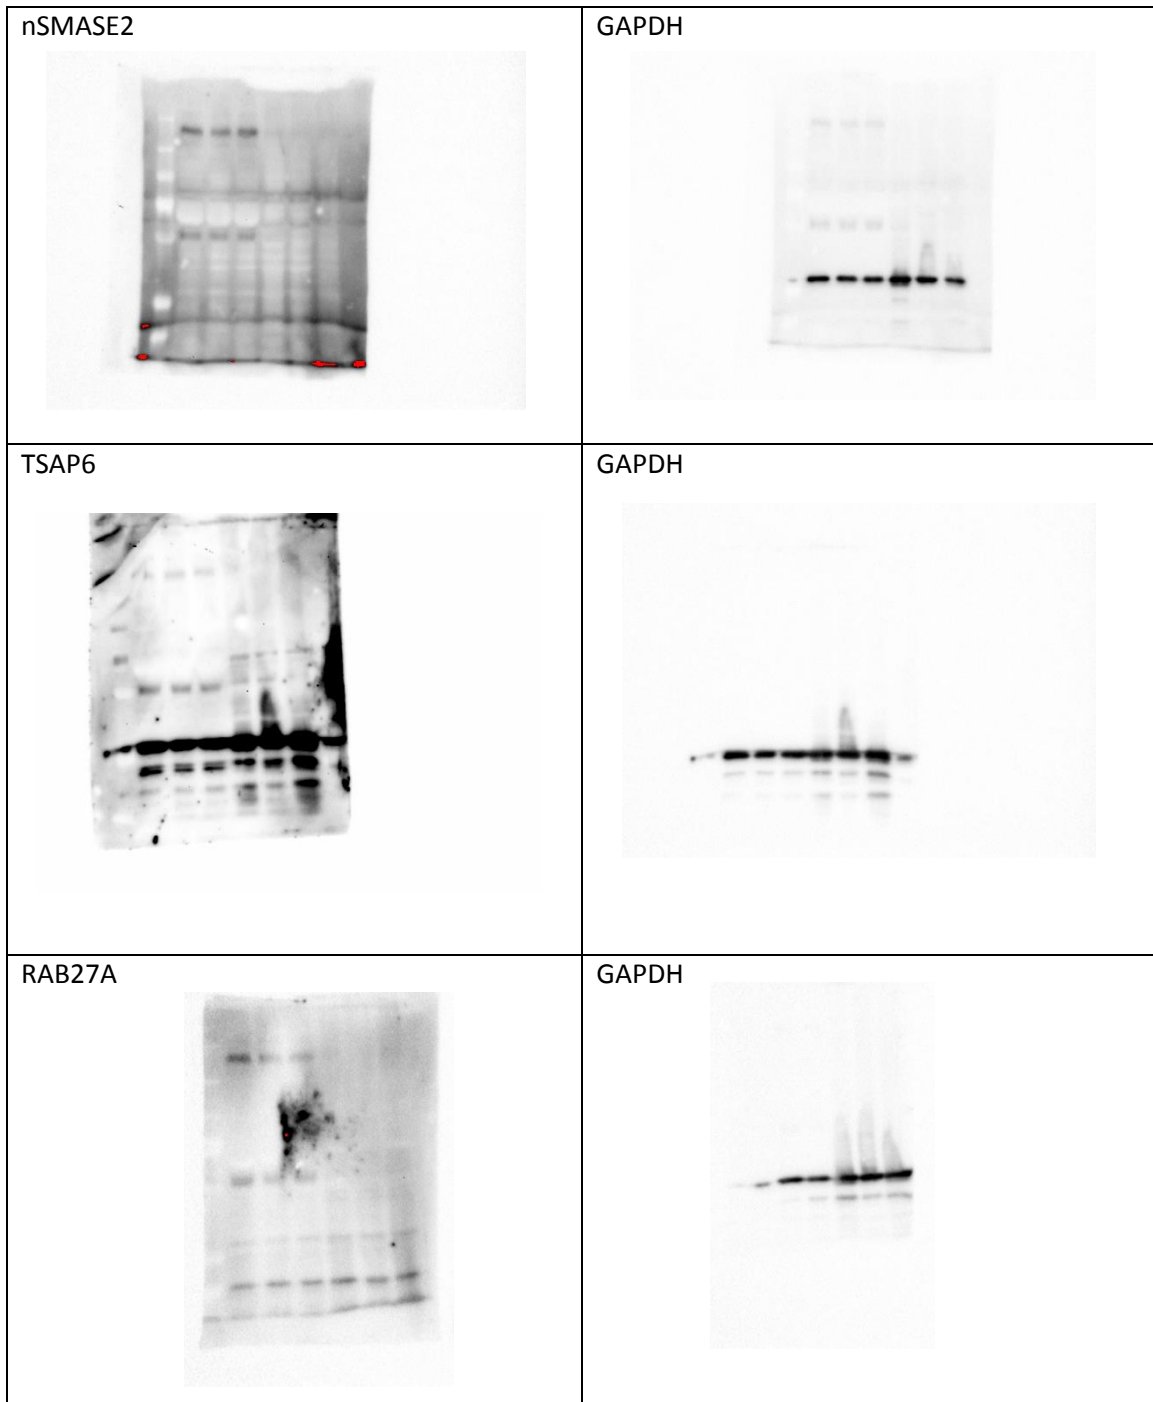

| case | group     | pancreas | liver | intestine | fat | spleen | ovary | muscle |
|------|-----------|----------|-------|-----------|-----|--------|-------|--------|
| A1   | Rab27a KO | 2        | 0     | 0         | 3   | 0      | 0.5   |        |
| A2   | Rab27a KO |          | 0     | 0         |     |        | 0     | 0      |
| A3   | Rab27a KO | 1        | 0     | 0         | 4   | 0      | 0     |        |
| A4   | Rab27a KO | 2        | 0     | 0         | 1   | 0      |       |        |
| B10  | Rab27b KO |          | 0     | 0         | 2   | 0      |       |        |
| B11  | Rab27b KO | 0        | 0     | 0         |     | 0      | 0.5   |        |
| B12  | Rab27b KO | 0        | 0     | 2         | 1   |        |       | 0      |
| C5   | control   | 2        | 0     | 5         | 3   | 0      | 0     | 0      |
| C6   | control   | 1        | 0     | 0         |     |        | 0.5   | 1      |
| C7   | control   | 7        | 0     | 3         |     |        |       |        |
| C8   | control   | 4        | 0     | 3         | 3   | 0      | 0     |        |
| C9   | control   | 5        | 0     | 2         | 5   | 0      |       |        |

| case | group     | kidney | comments          | p53      | Ki-67    | MMP2     | MMP9     |
|------|-----------|--------|-------------------|----------|----------|----------|----------|
| A1   | Rab27a KO |        | fat with necrosis | 4        | 4        | 1        | 0        |
| A2   | Rab27a KO | 0      |                   | no tumor | no tumor | no tumor | no tumor |
| A3   | Rab27a KO |        |                   | 4        | 4        | 3        | 0        |
| A4   | Rab27a KO | 0      |                   | 4        | 4        | 0        | 3        |
| B10  | Rab27b KO |        |                   | 2        | 4        | 0        | 0        |
| B11  | Rab27b KO | 0      |                   | 4        | 4        | 0        | 0        |
| B12  | Rab27b KO | 0      |                   | 4        | 4        | 3        | 0        |
| C5   | control   | 0      |                   | 4        | 3        | 3        | 4        |
| C6   | control   | 0      |                   | 4        | 4        | 4        | 3        |
| C7   | control   |        |                   | 4        | 4        | 4        | 3        |
| C8   | control   | 0      |                   | 3        | 4        | 4        | 4        |
| C9   | control   |        |                   | 4        | 4        | 4        | 4        |
